# Supplementary material
Source: publisher figshare collection journal article supplement (https://sage.figshare.com/ndownloader/files/21997776)
Supplement: Supplementary file 1 [file 21997776]

# Supplemental Material A

**Assumption check**

**Check for non-independencies in the dataset.**

Prior to any analyses, we tested the presence of non-independencies in the dataset, stemming from translators who provided more than one translation. As outlined in the [pre-registration](https://osf.io/jvp6r/?view_only=8d6c34df596d4cb49f9e106358ef0cd2), we did so in a sample of *N* =1,338 talks (*N* = 1,338 speakers, *N* = 234 translators); i.e., the subset of talks in which all translators provided more than one translation. The number of translations provided by any translator ranged from 2 to 88.

The results (see Table S1) indicated that for at least four word categories, the clustering of the data could not be ignored as the design effect was > 2, which is an indicator for non-independency (Muthen & Satorra, 1995). Among these categories were function word categories, e.g. pronouns and conjunctions, that were central for our main research question. Based on the observed non-independence for translators with more than one translation, we opted for a conservative approach and restricted the sample to the number of unique translators (*N* = 544, “Translated Subsample”) for the analyses in which the translations were in focus.

**References**

Muthen, B., & Satorra, A. (1995). Complex sample data in structural equation modeling. *Sociological methodology*, *25*(1), 267-316. <https://doi.org/10.2307/271070>

| *Table S1.* Test for non-independencies in dataset where translators provided multiple translations (*N* =1,338 talks). | | | | | |
| --- | --- | --- | --- | --- | --- |
| LIWC variable | Between-cluster variance | Within-cluster variance | ICC | Average cluster size | Design Effect |
| Words ≥ six letters | 1.01 | 12.27 | 0.08 | 25.80 | 2.89a |
| Numbers | 0.04 | 0.82 | 0.04 | 1.74 | 1.03 |
| Total function words | 1.39 | 7.74 | 0.15 | 53.80 | 9.03a |
| Pronouns | 0.74 | 7.25 | 0.09 | 17.73 | 2.54a |
| Personal pronouns | 0.65 | 6.18 | 0.10 | 9.95 | 1.86 |
| 1st person singular (I, …) | 0.29 | 5.02 | 0.05 | 2.96 | 1.11 |
| 3rd person singular (she, he, …) | 0.09 | 1.43 | 0.06 | 2.97 | 1.12 |
| 3rd person plural (they, …) | 0.07 | 0.87 | 0.08 | 1.87 | 1.07 |
| Articles | 0.25 | 2.77 | 0.08 | 10.84 | 1.81 |
| Prepositions | 0.12 | 1.91 | 0.06 | 9.95 | 1.54 |
| Adverbs | 0.04 | 0.67 | 0.06 | 3.98 | 1.17 |
| Conjunctions | 0.19 | 1.94 | 0.09 | 12.41 | 2.03a |
| Quantifiers | 0.00 | 0.53 | 0.01 | 2.99 | 1.01 |
| Positive Emotions | 0.02 | 0.89 | 0.02 | 2.94 | 1.04 |
| Anger | 0.00 | 0.10 | 0.02 | 0.24 | 0.99 |
| Anxiety | 0.00 | 0.05 | 0.03 | 0.19 | 0.98 |
| Swear words | 0.00 | 0.01 | 0.00 | 0.03 | 1.00 |
| Perception | 0.02 | 0.86 | 0.02 | 2.18 | 1.02 |
| Cognitive Processes | 0.04 | 5.56 | 0.01 | 15.51 | 1.11 |
| Insight | 0.00 | 0.67 | 0.01 | 2.53 | 1.01 |
| Causation | 0.01 | 0.50 | 0.02 | 2.54 | 1.04 |
| Discrepancy | 0.02 | 0.37 | 0.04 | 2.07 | 1.04 |
| Tentative | 0.00 | 0.76 | 0.00 | 3.04 | 1.01 |
| Certainty | 0.03 | 0.67 | 0.04 | 2.96 | 1.08 |
| Differentiation | 0.06 | 0.90 | 0.06 | 4.17 | 1.19 |
| Social words | 0.39 | 7.12 | 0.05 | 13.35 | 1.65 |
| Affiliation | 0.02 | 1.87 | 0.01 | 3.23 | 1.03 |
| Achievement | 0.02 | 0.68 | 0.03 | 3.47 | 1.08 |
| Power | 0.02 | 0.44 | 0.04 | 1.48 | 1.02 |
| Present focus | 0.18 | 1.91 | 0.09 | 5.19 | 1.37 |
| Home | 0.00 | 0.06 | 0.03 | 0.22 | 0.98 |
| Informal | 0.04 | 0.45 | 0.09 | 1.48 | 1.04 |
| Nonfluency | 0.00 | 0.01 | 0.04 | 0.03 | 0.96 |
| Fillers | 0.00 | 0.00 | 0.10 | 0.03 | 0.91 |
| *Note.* ICC = Intraclass correlation coefficient = Between-cluster variance / (between-cluster variance + within-cluster variance)  Design effect = 1 + (average_cluster_size – 1) ×ICC  aDesign effect > 2, indicating that the clustering of the data could not be ignored (Muthen & Satorra, 1995). | | | | | |

# Supplemental Material B

**Power considerations**

Our *N* was defined by the population of English TED Talks (see figure 2; “Full Sample”) and number of TED Talks that had been translated into German in the subpopulation “Translated Subsample” (see figure 2) in March 2018. Sensitivity analyses revealed that with a power of 80%, the *N’*s of the “Full Sample” and “Translated Subsample” allow for the detection of traditionally called “small” to “very small” effects. For our reported analyses, in the “Full Sample” effect sizes *f2*of 0.016 (alpha level of 5%) and 0.028 (alpha level of 0.1%) could be detected in RQ1 (speakers’ gender differences). In the “Translated Subsample”, detectable effects ranged from *f2* of 0.050 (alpha level of 5%) to 0.087 (alpha level of 0.1%). The literature suggests small effects for gender differences in language use (Newman et al., 2008) and our candidate word categories were based on those with an effect size of │*d*│ ≥ .15 in the Newman et al. (2008) sample (see Table 2), we thus believe that our sample sizes were appropriate for the reported analyses. As a form of cross-validation, we replicated the analyses of the “Full Sample” (RQ1, speakers) in the “Translated Subsample”. For RQ2, analyses had the sensitivity to detect effects of *f2* of 0.013 (alpha level of 5%) and 0.023 (alpha level of 0.1%).

**Assumption check for the MANOVAs reported**

**RQ1.**

Prior to running the models for speakers and for translators, we tested whether the assumptions for the MANOVA approach were met. For both models for the speakers and for the translators, the box's tests of equality of covariance matrices were significant (*p* < .001), therefore, homogeneity of variance-covariance matrices was not given in our data. However, the MANOVA approach is robust against violations of homogeneity covariance matrices if the group sizes are larger than 30 (Allen & Bennet, 2007) , which was the case in our sample.

Furthermore, in the first MANOVA for the speakers, homogeneity of error variances could not be assumed for several of our dependent variables (10 out of 34), as indicated by the significant Levene's tests for these variables (see Table S2). Also, in the second MANOVA that we conducted for the translators in the “Translated Subsample”, the requirement of homogeneity of error variances was not met either for several of our dependent variables (5 out of 34), as indicated by the significant Levene's tests (see Table S2). For this reason, we log-transformed all dependent variables in our models. With this procedure, we could reduce the degree of heteroscedasticity in our data. After log-transformation, in the first model (speakers) 8 out of 34 DVs showed significant Levene’s test result, which were “personal pronouns”, “shehe”, “they”, “anger”, “anxiety”, “swear”, “social” and “home”. In the second model (translators) 4 out of 34 DVs showed significant Levene’s test result after log-transformation). The affected variables were “six letter > words”, “number”, cause”, and “nonfluency”. Since the heteroscedasticity was not fully avoidable, we relied on a more conservative level of significance (0.1%) for the interpretation of the subsequent univariate test results, and particularly for the identification of gender-sensitive function word categories to be used in RQ2.

| *Table S2.* RQ1, speakers and translators: Levene’s test results before and after log-transformation of the dependent variables (DVs) for the reported models. | | | | | | | | |
| --- | --- | --- | --- | --- | --- | --- | --- | --- |
| LIWC variable | Speakers (“Full Sample”, *N* = 1,647) | | | | Translators («Translated Subsample», *N* = 544) | | | |
| Non-log-transformed DVs | | Log-transformeda DVs | | Non-logtransformed DVs | | Log-transformeda DVs | |
|  | F(1, 1,645) | *p* | F(1, 1,645) | *p* | F(1, 542) | *p* | F(1, 542) | *p* |
| Words ≥ six letters | 0.61 | .436 | 0.16 | .688 | 3.14 | .077 | 4.15 | .042* |
| Numbers | 14.20 | <.001*** | 2.51 | .113 | 9.56 | .002** | 7.52 | .006** |
| Total function words | 1.06 | .302 | 1.22 | .270 | 0.00 | .959 | .00 | .987 |
| Pronouns | 2.52 | .113 | 1.70 | .193 | 0.03 | .864 | .24 | .621 |
| Personal pronouns | 21.19 | <.001*** | 6.26 | .012* | 0.51 | .477 | .80 | .371 |
| 1st person singular (I, …) | 21.60 | <.001*** | 3.59 | .058 | 3.67 | .056 | .43 | .514 |
| 3rd person singular (she, he, …) | 17.19 | <.001*** | 10.51 | .001** | 1.33 | .250 | 2.19 | .139 |
| 3rd person plural (they, …) | 12.83 | <.001*** | 5.04 | .025* | 0.01 | .919 | .03 | .855 |
| Articles | 0.02 | .900 | 3.11 | .078 | 0.77 | .380 | .73 | .393 |
| Prepositions | 1.35 | .245 | 0.83 | .362 | 1.25 | .264 | .31 | .577 |
| Adverbs | 2.66 | .103 | 0.29 | .593 | 1.22 | .271 | 1.47 | .227 |
| Conjunctions | 1.10 | .295 | 0.02 | .892 | 0.00 | .967 | .05 | .823 |
| Quantifiers | 1.36 | .244 | 0.05 | .821 | 0.30 | .586 | .08 | .776 |
| Positive Emotions | 3.34 | .068 | 0.65 | .419 | 0.00 | .960 | .17 | .678 |
| Anger | 6.89 | .009** | 8.85 | .003** | 1.35 | .245 | .72 | .398 |
| Anxiety | 17.27 | <.001*** | 18.61 | <.001*** | 5.46 | .020* | 3.84 | .050 |
| Swear words | 5.06 | .025* | 6.02 | .014* | 0.46 | .498 | .30 | .582 |
| Perception | 0.17 | .676 | 0.92 | .339 | 0.00 | .977 | .09 | .765 |
| Cognitive Processes | 0.08 | .775 | 0.12 | .728 | 3.42 | .065 | 2.88 | .090 |
| Insight | 0.19 | .664 | 0.02 | .895 | 0.09 | .768 | .01 | .943 |
| Causation | 0.02 | .892 | 0.00 | .950 | 4.44 | .036* | 4.39 | .037* |
| Discrepancy | 0.64 | .425 | 0.81 | .369 | 0.00 | .949 | .11 | .740 |
| Tentative | 0.52 | .473 | 0.01 | .941 | 0.21 | .650 | .14 | .711 |
| Certainty | 3.46 | .063 | 3.18 | .075 | 1.25 | .263 | .91 | .339 |
| Differentiation | 0.21 | .647 | 0.06 | .812 | 0.15 | .696 | .33 | .563 |
| Social words | 25.94 | <.001*** | 7.37 | .007** | 0.07 | .793 | .02 | .882 |
| Affiliation | 0.88 | .349 | 1.23 | .268 | 0.28 | .598 | .17 | .684 |
| Achievement | 0.02 | .884 | 0.03 | .857 | 0.06 | .809 | .04 | .849 |
| Power | 0.82 | .367 | 0.38 | .538 | 0.11 | .740 | .00 | .944 |
| Present focus | 0.01 | .938 | 1.58 | .209 | 0.37 | .542 | .01 | .932 |
| Home | 10.50 | .001** | 10.30 | .001** | 2.17 | .141 | 2.10 | .148 |
| Informal | 2.06 | .151 | 0.42 | .517 | 4.36 | .037* | 1.30 | .254 |
| Nonfluency | 0.01 | .931 | 0.06 | .813 | 12.76 | <.001*** | 12.54 | <.001*** |
| Fillers | 2.13 | .145 | 1.94 | .164 | 1.88 | .171 | 2.09 | .149 |
| * *p* < .05, ** *p* < .01, ** *p* < .001  *Note.* aLIWC scores were log-transformed using the following formula: LN(x+1). A constant was added, sicne there were cases with LIWC scores = 0. | | | | | | | | |

**RQ2.**

The box's tests of equality of covariance matrices was significant (*p* < .001) for the model reported in RQ2, and therefore, homogeneity of variance-covariance matrices was not given in our data which could be neglected due our sample size > 30 (Allen & Bennet, 2007). Furthermore, homogeneity of error variances could not be assumed for one ("shehe") of the seven dependent variables in this research question, as indicated by the significant Levene's tests for this variable (see Table S3). In an attempt to reduce heteroscedasticity, we performed a log-transformation on the dependent variables. This, however, did not result in a decrease, as indicated by the Levene’s test, in which two out of the seven log-transformed difference scores showed a significant test result. We therefore computed our model using the original difference scores described above without any transformation.

| *Table S3.* RQ2: Results of Levene’s test for the dependent variables in the models computed. | | | | |
| --- | --- | --- | --- | --- |
| LIWC variables (Difference scores) | Non-logtransformed DVs | | Logtransformeda DVs | |
|  | F(3, 540) | *p* | F(3, 540) | *p* |
| Numbers | 0.48 | .694 | 0.79 | .502 |
| Personal pronouns | 1.20 | .308 | 1.15 | .330 |
| 1st person singular (I, …) | 2.13 | .096 | 2.32 | .074 |
| 3rd person singular (she, he, …) | 4.32 | .005** | 5.32 | .001** |
| 3rd person plural (they, …) | 2.60 | .052 | 1.88 | .132 |
| Articles | 0.94 | .423 | 0.97 | .405 |
| Conjunctions | 2.10 | .099 | 3.92 | .009** |
| * *p* < .05, ** *p* < .01, ** *p* < .001  *Note.* All LIWC scores represent difference scores of z-transformed LIWC scores “translator minus speaker”.  aLIWC scores were log-transformed using the following formula: LN(x+4). | | | | |

**References**

Allen, P. J., & Bennett, K. (2007). *SPSS for the health and behavioural sciences*. Thomson Learning.

# Supplemental Material C

## Research Question 1

## Background: Candidate LIWC – categories of gender differences in language use.

Based on the literature on gender and language, female speakers were for example expected to use more words referring to affective (e.g. "happy", "sad"), social processes (e.g. "family", "friends"), and cognitive processes ("but", "except", "realize"). The latter one with its various subcategories includes indicators for elaboration (differentiation words: e.g. "but"; "except"), and for assertiveness in language (certainty words: e.g. "always", "never"; discrepancy words: e.g. "should", "would"). Filler words and non-fluency markers such as "ehm" further serve as indicators of assertive language.

Female speakers were further expected to use more pronouns, meaning that they refer more to other people (e.g. "she", "he", "they", ...), but also more to themselves (e.g. "I"). Higher pronoun use has been linked with more immediate (Pennebaker & King, 1999), contextual (Heylighen & Dewaele, 2002) and dynamic language (Pennebaker, Chung, Frazee, Lavergne, & Beaver, 2014). More specifically, first person singular pronoun use has been found to be associated with lower status (Kacewicz, Pennebaker, Davis, Jeon, & Graesser, 2014) and distress proneness (Tackman et al., 2018). Similarly, females were expected to use more conjunctions; words that link sentences like “and, but, however”. Conjunctions, together with pronouns are seen as a signal of a more dynamic, narrative language style (Pennebaker et al., 2014) not linked to formality (Heylighen & Dewaele, 2002).

In contrast, we expected male speakers to show a more categorical and complex language style (as opposed to a dynamic, narrative language style), as indicated by a higher use of articles, prepositions and long words. The more frequent use of articles paired with a more frequent use of numbers can also be considered as a more object-, fact-oriented, or instrumental language style.

## References

Heylighen, F., & Dewaele, J.-M. (2002). Variation in the contextuality of language: An empirical measure. *Foundations of Science*, *7*(3), 293–340.

Kacewicz, E., Pennebaker, J. W., Davis, M., Jeon, M., & Graesser, A. C. (2014). Pronoun use reflects standings in social hierarchies. *Journal of Language and Social Psychology*, *33*(2), 125–143. https://doi.org/10.1177/0261927X13502654

Pennebaker, James W., Chung, C. K., Frazee, J., Lavergne, G. M., & Beaver, D. I. (2014). When small words foretell academic success: The case of college admissions essays. *PloS One*, *9*(12), e115844.

Pennebaker, James W., & King, L. A. (1999). Linguistic styles: language use as an individual difference. *Journal of Personality and Social Psychology*, *77*(6), 1296.

# Supplemental Material D

## Research question 1, Additional Analysis: Replication of speaker’s gender differences in subsample

The same MANOVA as in the reported analysis for RQ1 was conducted to examine gender differences of *speaker*’s language use in the smaller subsample (“Translated Subsample”, *N* = 544 talks). There was a statistically significant difference in language use based on speakers’ gender, *F* (34, 508) = 3.58, *p* < .001; Pillai's Trace = 0.193, η2P =.193. The majority of the univariate gender effects found in the large sample generalized onto the effects in the smaller sample. Six categories that showed significant gender differences (*p* < .05) in the large sample were not significant in the smaller sample (“adverbs”, “anger”, “perception”, “differentiation”, “focuspresent”, and “informal”). In addition, in the smaller sample, a marginally significant gender difference for “total function words” was found (*p* = .049, F (1, 541) = 3.89, η2P =.007), that was not present in the larger sample. The results of the univariate tests are reported in Table S4.

In sum, we found gender differences in the use of several LIWC categories for TED speakers. Female TED speakers’ language style was characterized by a higher use of personal pronouns and conjunctions, supporting the assumption of a more personal and dynamic language style. On the other hand, male TED speakers in our sample used more numbers, and articles, indicating a more impersonal, and categorical language style. We also found gender differences in content related categories (in the order of the effect size): females used more social, anxiety, affiliation, and home related words, and men more words referring to an informal language style.

Contrary to our expectations from the literature, we did not find any significant gender differences for "prepositions" or "swear" words, and gender differences for “cognitive processes” were only observable for the subcategories “insight” and “differentiation”, and disappeared when relying on a more conservative alpha level (0.1% due to the presence of heteroscedasticity in our data).

Regarding assertiveness in language, our results were in the other direction than expected, as “nonfluency markers” and “informal language” were used more by male TED speakers. Considering that female TED speakers are an underrepresented group in the TED conference (32.7% in our sample), the results suggest that female speakers attempt to achieve more respectability and authority by avoiding informal and non-fluent language. The female preference for the use of more words referring to “anxiety” further suggests that female speakers opened up more personally to the audience than male speakers, and that this was particularly the case for negative experiences.

| *Table S4.* Replication of TED speakers’ gender differences in language use in the smaller sample (“Translated Subsample”, *N* = 544). | | | | | |
| --- | --- | --- | --- | --- | --- |
| LIWC variable | Speaker *M* [95% CI] | | F  (1, 541) | *p* | η2P [90% CI] |
| Female  (*N* = 168) | Male  (*N* = 376) |
| Words ≥ six letters | 18.06 [17.57; 18.55] | 17.83 [17.53; 18.13] | 0.17 | .683 | .0003 [.000, .007] |
| Numbers | 1.78 [1.67; 1.89] | 2.07 [1.98; 2.16] | 10.51 | .001** | .019 [.005, .042] |
| Total function words | 55.74 [55.22; 56.25] | 55.61 [55.28; 55.93] | 3.89 | .049* | .007 [.00002, .024] |
| Pronouns | 16.33 [15.85; 16.82] | 15.69 [15.42; 15.96] | 8.95 | .003** | .016 [.003, .038] |
| Personal pronouns | 9.31 [8.87; 9.75] | 8.20 [7.97; 8.42] | 17.88 | <.001*** | .032 [.012, .060] |
| 1st person singular (I, …) | 3.31 [2.93; 3.69] | 2.38 [2.20; 2.57] | 17.58 | <.001*** | .031 [.012, .059] |
| 3rd person singular (she, he, …) | 0.91 [0.74; 1.07] | 0.63 [0.55; 0.70] | 12.36 | <.001*** | .022 [.006, .047] |
| 3rd person plural (they, …) | 1.30 [1.19; 1.42] | 1.12 [1.06; 1.19] | 7.17 | .008** | .013 [.002, .033] |
| Articles | 7.05 [6.85; 7.25] | 7.75 [7.62; 7.88] | 32.70 | <.001*** | .057 [.029, .091] |
| Prepositions | 13.59 [13.37; 13.82 ] | 13.58 [13.44; 13.72] | 0.28 | .594 | .001 [.000, .008] |
| Adverbs | 5.72 [5.54; 5.90] | 5.92 [5.78; 6.05] | 0.18 | .671 | .0003 [.000, .007] |
| Conjunctions | 7.56 [7.38; 7.75] | 7.19 [7.06; 7.32] | 13.75 | <.001*** | .025 [.008, .050] |
| Quantifiers | 2.28 [2.18; 2.38] | 2.44 [2.37; 2.51] | 5.92 | .015* | .011 [.001, .030] |
| Positive Emotions | 2.77 [2.63; 2.92] | 2.63 [2.53; 2.73] | 2.41 | .122 | .004 [.000, .018] |
| Anger | 0.35 [0.29; 0.41] | 0.32 [0.28; 0.37] | 1.07 | .300 | .002 [.000, .013] |
| Anxiety | 0.33 [0.26; 0.40 ] | 0.22 [0.19; 0.25] | 15.18 | <.001*** | .027 [.009, .054] |
| Swear words | 0.03 [0.02; 0.04] | 0.04 [0.03; 0.04] | 0.28 | .599 | .001 [.000, .008] |
| Perception | 2.43 [2.27; 2.59] | 2.54 [2.44; 2.65] | 2.00 | .158 | .004 [.000, .017] |
| Cognitive Processes | 11.73 [11.43; 12.04] | 11.68 [11.46; 11.90] | 0.95 | .329 | .002 [.000, .012] |
| Insight | 2.62 [2.50; 2.74] | 2.48 [2.39; 2.57] | 5.05 | .025* | .009 [.001, .027] |
| Causation | 2.09 [1.98; 2.19] | 2.00 [1.93; 2.06] | 1.14 | .286 | .002 [.000, .013] |
| Discrepancy | 1.46 [1.39; 1.54] | 1.52 [1.47; 1.58] | 0.27 | .600 | .001 [.000, .008] |
| Tentative | 2.43 [2.31; 2.54] | 2.61 [2.53; 2.69] | 2.85 | .092 | .005 [.000, .020] |
| Certainty | 1.37 [1.30; 1.44] | 1.37 [1.33; 1.42] | 0.10 | .751 | .0002 [.000, .006] |
| Differentiation | 3.13 [3.02; 3.25] | 3.15 [3.07; 3.23] | 0.32 | .570 | .001 [.000, .009] |
| Social words | 11.02 [10.54; 11.51] | 9.81 [9.54; 10.07] | 21.46 | <.001*** | .038 [.016, .068] |
| Affiliation | 3.29 [3.09; 3.50] | 3.01 [2.88; 3.14] | 4.49 | .034* | .008 [.0003, .025] |
| Achievement | 1.61 [1.51; 1.70] | 1.50 [1.43; 1.56] | 2.89 | .090 | .005 [.000, .020] |
| Power | 2.41 [2.25; 2.57] | 2.43 [2.32; 2.53] | 0.29 | .589 | .001 [.000, .008] |
| Present focus | 10.91 [10.55; 11.27] | 11.19 [10.95; 11.44] | 0.01 | .908 | .00002 [.000, .001] |
| Home | 0.33 [0.29; 0.37] | 0.26 [0.23; 0.28] | 7.76 | .006** | .014 [.002, .035] |
| Informal | 0.39 [0.35; 0.43] | 0.46 [0.42; 0.50] | 1.95 | .163 | .004 [.000, .017] |
| Nonfluency | 0.17 [0.15; 0.19] | 0.20 [0.19; 0.22] | 2.99 | .084 | .005 [.000, .021] |
| Fillers | 0.01 [0.01; 0.01] | 0.01 [0.01; 0.01] | 0.06 | .808 | .0001 [.000, .005] |
| * *p* < .05, ** *p* < .01, ** *p* < .001  *Note.* Means refer to percentages of the total words used. All LIWC scores were log-transformed prior to analysis. Bounds of CI = .000 correspond to values <.0001. | | | | | |

| *Table S5.* RQ1, speakers smaller subsample (“Translated Subsample”): Levene’s test results before and after log-transformation of the dependent variables (DVs) | | | | |
| --- | --- | --- | --- | --- |
| LIWC variable | Speakers (“Translated Subsample”, *N* = 544) | | | |
| Non-logtransformed DVs | | Log-transformeda DVs | |
|  | F(1, 542) | *p* | F(1, 542) | *p* |
| Words ≥ six letters | 2.00 | .158 | 1.60 | .207 |
| Numbers | 7.25 | .007** | 1.78 | .183 |
| Total function words | 1.39 | .240 | 1.06 | .305 |
| Pronouns | 7.63 | .006** | 4.80 | .029* |
| Personal pronouns | 20.89 | <.001*** | 10.01 | .002** |
| 1st person singular (I, …) | 25.63 | <.001*** | 10.13 | .002** |
| 3rd person singular (she, he, …) | 19.46 | <.001*** | 13.03 | <.001*** |
| 3rd person plural (they, …) | 3.14 | .077 | 1.51 | .220 |
| Articles | 0.02 | .899 | 1.31 | .253 |
| Prepositions | 1.04 | .309 | 0.92 | .339 |
| Adverbs | 3.43 | .065 | 2.06 | .151 |
| Conjunctions | 0.00 | .953 | 0.48 | .491 |
| Quantifiers | 0.04 | .846 | 0.65 | .421 |
| Positive Emotions | 0.31 | .577 | 0.02 | .875 |
| Anger | 0.05 | .824 | 0.02 | .899 |
| Anxiety | 5.08 | .025* | 5.73 | .017* |
| Swear words | 2.66 | .103 | 2.11 | .147 |
| Perception | 0.10 | .751 | 1.49 | .224 |
| Cognitive Processes | 1.83 | .176 | 1.93 | .165 |
| Insight | 0.31 | .576 | 0.63 | .428 |
| Causation | 0.32 | .570 | 0.02 | .890 |
| Discrepancy | 0.31 | .575 | 0.00 | .956 |
| Tentative | 0.08 | .780 | 0.37 | .541 |
| Certainty | 1.61 | .206 | 2.54 | .112 |
| Differentiation | 1.04 | .308 | 1.47 | .226 |
| Social words | 9.50 | .002** | 2.29 | .131 |
| Affiliation | 1.69 | .194 | 0.01 | .913 |
| Achievement | 0.06 | .812 | 0.42 | .516 |
| Power | 0.05 | .830 | 0.09 | .763 |
| Present focus | 0.50 | .480 | 0.16 | .687 |
| Home | 8.76 | .003** | 7.65 | .006** |
| Informal | 1.45 | .230 | 0.11 | .743 |
| Nonfluency | 5.01 | .026* | 3.48 | .062 |
| Fillers | 0.01 | .911 | 0.00 | .959 |
| * *p* < .05, ** *p* < .01, ** *p* < .001  *Note.* aLIWC scores were log-transformed using the following formula: LN(x+1). | | | | |

# Supplemental Material E

## Additional Analysis: *Speaker’s* gender main effect on *translated* language use.

| *Table S6.* Language use in translations by original TED *speaker’s* gender | | | | | |
| --- | --- | --- | --- | --- | --- |
| LIWC variable | Speaker  *M* [95% CI] | | F(1, 540) | *p* | η2P [90% CI] |
| Female  (*N* = 168) | Male  (*N* = 376) |
| Words ≥ six letters | 26.28 [25.70; 26.86] | 25.98 [25.62; 26.34] | 0.10 | .748 | .0002 [.000; .006] |
| Numbers | 1.54 [1.43; 1.64] | 1.84 [1.76; 1.93] | 14.84 | <.001*** | .027 [.009; .053] |
| Total function words | 53.88 [53.43; 54.33] | 53.47 [53.18; 53.76] | 9.66 | .002** | .018 [.004; .040] |
| Pronouns | 17.74 [17.27; 18.21] | 17.22 [16.95; 17.50] | 7.28 | .007** | .013 [.002; .034] |
| Personal pronouns | 10.65 [10.21; 11.09] | 9.35 [9.10; 9.59] | 26.64 | <.001*** | .047 [.022; .079] |
| 1st person singular (I, …) | 3.49 [3.09; 3.89] | 2.52 [2.32; 2.73] | 15.02 | <.001*** | .027 [.009; .053] |
| 3rd person singular (she, he, …) | 3.14 [2.95; 3.32] | 2.82 [2.71; 2.94 ] | 10.92 | .001** | .020 [.005; .043] |
| 3rd person plural (they, …) | 2.04 [1.88; 2.20] | 1.74 [1.66; 1.83] | 12.22 | .001** | .022 [.006; .047] |
| Articles | 10.44 [10.17; 10.70] | 11.19 [11.03; 11.35] | 20.47 | <.001*** | .037 [.015; .066] |
| Prepositions | 10.29 [10.08; 10.51] | 9.92 [9.79; 10.06] | 1.73 | .189 | .003 [.000; .016] |
| Adverbs | 4.01 [3.89; 4.12] | 3.93 [3.85; 4.02] | 1.12 | .291 | .002 [.000; .013] |
| Conjunctions | 12.36 [12.15; 12.57] | 12.30 [12.17; 12.44] | 2.71 | .100 | .005 [.000; .020] |
| Quantifiers | 2.86 [2.75; 2.96] | 3.02 [2.95; 3.09] | 4.38 | .037* | .008 [.0003; .025] |
| Positive Emotions | 2.93 [2.78; 3.07] | 2.90 [2.81; 2.99] | 0.08 | .783 | .0001 [.000; .006] |
| Anger | 0.26 [0.21; 0.30] | 0.25 [0.21; 0.28] | 0.24 | .627 | .0004 [.000; .008] |
| Anxiety | 0.25 [0.20; 0.31] | 0.17 [0.15; 0.20] | 11.83 | .001** | .021 [.006; .046] |
| Swear words | 0.02 [0.01; 0.03] | 0.03 [0.02; 0.04] | 1.86 | .173 | .003 [.000; .016] |
| Perception | 2.00 [1.88; 2.12] | 2.08 [2.00; 2.17] | 1.54 | .216 | .003 [.000; .015] |
| Cognitive Processes | 15.62 [15.26; 15.98] | 15.58 [15.35; 15.82] | 0.26 | .611 | .0005 [.000; .008] |
| Insight | 2.65 [2.53; 2.76] | 2.49 [2.41; 2.57] | 4.71 | .030* | .009 [.0004; .026] |
| Causation | 2.49 [2.38; 2.60] | 2.55 [2.49; 2.61] | 0.15 | .695 | .0003 [.000; .007] |
| Discrepancy | 2.08 [2.00; 2.17] | 2.08 [2.02; 2.13] | 0.62 | .431 | .001 [.000; .011] |
| Tentative | 3.07 [2.93; 3.20] | 3.06 [2.98; 3.14] | 0.54 | .463 | .001 [.000; .010] |
| Certainty | 2.98 [2.84; 3.11] | 2.94 [2.86; 3.02] | 0.83 | .363 | .002 [.000; .012] |
| Differentiation | 4.33 [4.19; 4.46] | 4.21 [4.12; 4.29] | 3.25 | .072 | .006 [.000; .021] |
| Social words | 13.81 [13.37; 14.25] | 12.90 [12.65; 13.16] | 17.47 | <.001*** | .031 [.012; .059] |
| Affiliation | 3.37 [3.17; 3.57] | 3.17 [3.04; 3.30] | 3.03 | .082 | .006 [.000; .021] |
| Achievement | 3.52 [3.41; 3.63] | 3.47 [3.39; 3.55] | 0.39 | .531 | .001 [.000; .009] |
| Power | 1.56 [1.45; 1.68] | 1.56 [1.49; 1.63] | 0.00 | .948 | .00001 [.000; .000] |
| Present focus | 4.83 [4.61; 5.04] | 5.27 [5.13; 5.41] | 3.29 | .070 | .006 [.000; .022] |
| Home | 0.26 [0.22; 0.30] | 0.21 [0.19; 0.23] | 4.53 | .034* | .008 [.0003; .026] |
| Informal | 1.26 [1.18; 1.35] | 1.52 [1.44; 1.59] | 8.13 | .005** | .015 [.003; .036] |
| Nonfluency | 0.03 [0.02; 0.03] | 0.03 [0.02; 0.04] | 0.01 | .914 | .00002 [.000; .001] |
| Fillers | 0.03 [0.02; 0.03] | 0.03 [0.02; 0.04] | 0.05 | .828 | .0001 [.000; .004] |
| * *p* < .05, ** *p* < .01, ** *p* < .001  *Note.* Means refer to percentages of the total words used. All LIWC scores were log-transformed prior to analysis. Lower bounds of CI = .000 correspond to values <.0001. | | | | | |

| *Table S7*. Language use in translations by original TED *speaker’s* gender: Levene’s test results before and after log-transformation of the dependent variables (DVs) | | | | |
| --- | --- | --- | --- | --- |
| LIWC variable | Non-logtransformed DVs | | Log-transformeda DVs | |
|  | F(3, 540) | *p* | F(3, 540) | *p* |
| Words ≥ six letters | 1.77 | .151 | 1.97 | .118 |
| Numbers | 4.55 | .004** | 2.94 | .033* |
| Total function words | .08 | .972 | .03 | .993 |
| Pronouns | 1.69 | .168 | .98 | .401 |
| Personal pronouns | 5.42 | .001** | 2.52 | .057 |
| 1st person singular (I, …) | 10.24 | <.001*** | 5.07 | .002** |
| 3rd person singular (she, he, …) | 2.65 | .048* | 2.31 | .075 |
| 3rd person plural (they, …) | 3.78 | .010* | 2.90 | .034* |
| Articles | .74 | .526 | 1.37 | .251 |
| Prepositions | .87 | .457 | .64 | .589 |
| Adverbs | 1.16 | .326 | 1.43 | .233 |
| Conjunctions | .06 | .983 | .10 | .962 |
| Quantifiers | .43 | .730 | .93 | .425 |
| Positive Emotions | .04 | .989 | .05 | .986 |
| Anger | .50 | .683 | .30 | .828 |
| Anxiety | 3.44 | .017* | 2.91 | .034* |
| Swear words | 1.07 | .363 | 1.19 | .311 |
| Perception | .02 | .995 | .25 | .861 |
| Cognitive Processes | 1.23 | .297 | 1.10 | .348 |
| Insight | .08 | .971 | .08 | .971 |
| Causation | 3.44 | .017* | 3.12 | .026* |
| Discrepancy | .23 | .876 | .19 | .906 |
| Tentative | .55 | .646 | .51 | .679 |
| Certainty | .89 | .446 | .87 | .459 |
| Differentiation | .67 | .568 | .56 | .645 |
| Social words | 2.46 | .062 | .97 | .409 |
| Affiliation | .66 | .579 | .43 | .733 |
| Achievement | .50 | .681 | 1.11 | .346 |
| Power | .41 | .746 | .37 | .771 |
| Present focus | .43 | .729 | .78 | .503 |
| Home | 3.67 | .012* | 2.96 | .032* |
| Informal | 2.48 | .060 | .88 | .452 |
| Nonfluency | 4.46 | .004** | 4.34 | .005** |
| Fillers | 1.39 | .244 | 1.51 | .211 |
| * *p* < .05, ** *p* < .01, ** *p* < .001  *Note.* aLIWC scores were log-transformed using the following formula: LN(x+1). | | | | |

# Supplemental Material F

## Research question 2: Univariate results for the main analysis reported in manuscript.

| *Table S8.* Results of the univariate analyses for research question 2, for the main effects of “dyad type” (same versus opposite gender) , “translator’s gender”, and the dyad type × translator’s gender interaction effect: Differences of z-transformed LIWC scores “translator minus speaker”. | | | | | | | | | |
| --- | --- | --- | --- | --- | --- | --- | --- | --- | --- |
|  | Dyad type | | | Translator’s gender | | | dyad type × translator’s gender | | |
| LIWC variables (Difference scores) | F(1, 539) | *p* | η2P [90% CI] | F(1, 539) | *p* | η2P [90% CI] | F(1, 539) | *p* | η2P [90% CI] |
| Numbers | 1.62 | .204 | .003  [.000, .015] | 1.89 | .170 | .003  [.000, .017] | 0.60 | .437 | .001  [.000, .011] |
| Personal pronouns | 1.17 | .280 | .002  [.000, .014] | 0.06 | .807 | .0001  [.000, .005] | 0.99 | .320 | .002  [.000, .013] |
| 1st person singular (I, …) | 0.69 | .405 | .001  [.000, .011] | 0.04 | .852 | .0001  [.000, .003] | 1.57 | .210 | .003  [.000, .015] |
| 3rd person singular (she, he, …) | 1.21 | .272 | .002  [.000, .014] | 0.39 | .534 | .001  [.000, .009] | 0.57 | .452 | .001  [.000, .010] |
| 3rd person plural (they, …) | 0.51 | .473 | .001  [.000, .010] | 0.10 | .757 | .0002  [.000, .006] | 1.26 | .262 | .002  [.000, .014] |
| Articles | 0.02 | .879 | .00004 [.000, .002] | 0.03 | .857 | .0001  [.000, .003] | 4.00 | .046* | .007  [.000, .024] |
| Conjunctions | .67 | .412 | .001  [.000, .011] | 5.26 | .022* | .010  [.001, .028] | 5.36 | .021* | .010  [.001, .028] |
| * *p* < .05, ** *p* < .01, ** *p* < .001  *Note.* The dependent variables were difference scores of z-transformed LIWC scores “translator minus speaker”.  The LIWC variables investigated here were determined based on the gender differences in function word categories that were empirically found in RQ 1. | | | | | | | | | |

# Supplemental Material G

## Research question 2: Descriptives by the four different speaker/translator dyad types.

| *Table S9.*  Descriptives for the four different speaker/translator dyad compositions | | | | | |
| --- | --- | --- | --- | --- | --- |
|  |  | *M* [95% CI] | | | |
| LIWC variables |  | Female speaker / female translator | Male speaker/ male translator | Male speaker/ female translator | Female speaker / male translator |
| *N* |  | 113 | 185 | 191 | 55 |
| Total word count | Speaker | 2150.80 [1993.90 ,2307.69] | 2611.41 [2467.82, 2754.99] | 2676.01 [2524.95, 2827.06] | 2183.31 [1931.00, 2435.62] |
|  | Translator | 1956.27 [1809.07, 2103.47] | 2435.83 [2300.14, 2571.52] | 2416.75 [2276.95, 2556.55] | 2017.80 [1778.61 , 2256.99] |
| Numbers | Speaker | -0.23 [-0.38, -0.07][-0.36, -0.06] | 0.17  [0.01, 0.33] | 0.04  [ -0.09, 0.18] | -0.26  [-0.50, -0.03] |
|  | Translator | -0.24 [-0.39, -0.10] | 0.13  [-0.04 , 0.29] | 0.10  [ -0.03, 0.24] | -0.28  [-0.53, -0.04] |
| Personal pronouns | Speaker | 0.35  [ 0.15, 0.55] | -0.09  [-0.22 ,0.04 ] | -0.18  [-0.31, -0.05] | 0.22  [-0.14, 0.57] |
|  | Translator | 0.40  [ 0.21, 0.59] | -0.09  [-0.23 , 0.04] | -0.21  [-0.34, -0.08] | 0.23  [-0.11, 0.56] |
| 1st person singular (I, …) | Speaker | 0.36 [0.15, 0.58][10, 0.51] | -0.21  [-0.32, -0.09] | -0.07  [-0.21 , 0.06] | 0.19  [-0.15, 0.54] |
|  | Translator | 0.35  [ 0.14, 0.56] | -0.21  [-0.32, -0.09] | -0.06  [-0.20, 0.07] | 0.19  [-0.15, 0.53] |
| 3rd person singular (she, he, …) | Speaker | 0.22 [0.02, 0.43][ 0.05, 0.47] | -0.09  [-0.21, 0.03] | -0.10  [-0.23, 0.02] | 0.21  [-0.19, 0.61] |
|  | Translator | 0.20 [0.01, 0.38][ 00.44] | -0.02  [-0.16, 0.13] | -0.15  [-0.28, -0.01] | 0.16  [-0.17, 0.48] |
| 3rd person plural (they, …) | Speaker | 0.25  [0.04 ,0.45] | -0.08  [-0.22, 0.06] | -0.08  [-0.21 ,0.05] | 0.06  [ -0.24, 0.37] |
|  | Translator | 0.29  [ 0.10, 0.49] | -0.06  [-0.20, 0.08] | -0.14  [ -0.26, -0.01] | 0.08  [ -0.25, 0.42] |
| Articles | Speaker | -0.44  [-0.61, -0.27] | 0.07  [-0.06, 0.20] | 0.26  [0.11, 0.40] | -0.23  [-0.53, 0.08] |
|  | Translator | -0.39  [-0.57 ,-0.21] | 0.04  [-0.09, 0.18] | 0.23  [0.10, 0.37] | -0.15  [ -0.47, 0.16] |
| Conjunctions | Speaker | 0.16  [-0.03 , 0.35] | -0.20  [-0.34, -0.05] | 0.01 [-0.13, 0.15][ -0.12, 0.17] | 0.29  [ 0.07, 0.52] |
|  | Translator | -0.05  [-0.25 , 0.14] | 0.01  [-0.14, 0.15] | -0.03  [-0.17 , 0.11] | 0.20  [ -0.07, 0.46] |
| *Note.* All means (except for total word count) represent z-transformed LIWC scores of the original speaker and of the translator. | | | | | |

## Research question 2, Additional Analysis: Language use in translations by the four different speaker/translator dyad types

In addition to the main analyses in RQ2 (where we relied on a binary “dyad type”factor, i.e. same-gender versus opposite-gender speaker/translator dyads), we computed another MANOVA as a more finegrained analyses with a “dyad compoisiton”-factor covering all four dyad types (i.e. the four different possible speaker/translator dyads: female-female, male-male, male-female, female, male). This approach was chosen to see whether any of the specific translator and speaker gender constellations explained the results, rather than the merely having the same or opposite gender.

Pairwise comparisons were conducted, using Bonferroni’s correction for multiple testings. The multivariate effect of total word count was significant, F (7, 533) = 3.56, *p* = .001; Pillai’s Trace = .045, η2P = .045. There was a statistically significant multivariate effect of “dyad composition” on the LIWC difference scores, F (21, 1,605) = 1.95, *p* = .006; Pillai’s Trace = .074, η2P = .025. The results of the univariate analysis are presented in Table S10.

Out of the LIWC difference scores, the difference score for “conjunctions” showed significant differences based on the new “dyad composition” factor, F(3, 539) = 5.48, *p* = .001, η2P = .030, 90% CI = [.005, .020]. The pairwise comparisons showed that there were statistically significant differences in the difference score for “conjunctions” between dyad 1 (female /female) and dyad 2 (male/male), *p* = .001, mean difference = -.37, 95 % CI = [-.64, -.11]. This means that the use of conjunctions in the translations was more reduced in same-gender dyads when the translator was female, rather than male. Furthermore, there was a significant difference in the difference score for “conjunctions” between dyad 2 (male/male) and dyad 3 (male speaker / female translator), *p* = .021, mean difference = .25, 95 % CI = [.02, .47]. Conjunctions were therefore more reduced (relatively to the original transcript) in male/female dyads, compared to male/male dyads. The base rates in conjunction use in male speaker / male translator dyads was lowest, while it was highest in the dyads with female speakers and male translators. Together with the dyad type × translator's gender interaction effect found in the main analyses, this hints towards gender-specific tendencies of translators to level out extreme values of conjunction and article use.

| *Table S10.* Results of the additional analysis for research question 2 (with the “dyad composition” variable representing the four different dyad compositions): Differences of z-transformed LIWC scores “translator minus speaker”. | | | | | | | | |
| --- | --- | --- | --- | --- | --- | --- | --- | --- |
|  |  | Dyad type categories | | | |  |  |  |
| LIWC variables (Difference scores) |  | Female speaker / female translator | Male speaker / male translator | Male speaker / female translator | Female speaker / male translator | F(3, 539) | *p* | η2P [90% CI] |
| Numbers | *M* [95% CI] | -0.02 [-0.10, 0.06] | -0.04 [-0.10, 0.02] | 0.06 [0.00, 0.12] | -0.02 [-0.13, 0.08] | 2.28 | .079 | .013 [.000, .028] |
| Personal pronouns | *M* [95% CI] | 0.04 [-0.02, 0.11] | 0.00 [-0.05, 0.05] | -0.03 [-0.08, 0.02] | 0.00 [ -0.09, 0.09] | 0.95 | .416 | .005 [.000, .015] |
| 1st person singular (I, …) | *M* [95% CI] | -0.01 [-0.04, 0.01] | 0.00 [-0.01, 0.02] | 0.01 [-0.01, 0.02] | 0.00 [-0.03, 0.03] | 0.98 | .401 | .005 [.000, .015] |
| 3rd person singular (she, he, …) | *M* [95% CI] | -0.02 [-0.16, 0.12] | 0.08 [-0.03, 0.18] | -0.05 [ -0.15, 0.06] | -0.06 [-0.25, 0.14] | 1.06 | .364 | .006 [.000, .016] |
| 3rd person plural (they, …) | *M* [95% CI] | 0.08 [-0.07, 0.22] | -0.01 [-0.10, 0.13] | -0.07 [-0.18, 0.05] | 0.04 [-0.17, 0.25] | 0.85 | .468 | .005 [.000, .014] |
| Articles | *M* [95% CI] | 0.07 [-0.04, 0.19] | -0.04 [-0.12, 0.05] | -0.04 [-0.12, 0.05] | 0.09 [ -0.07, 0.25] | 1.38 | .247 | .008 [.000, .020] |
| Conjunctions | *M* [95% CI] | -0.18 [-0.34, -0.03] | 0.19 [0.07, 0.31] | -0.06 [-0.18, 0.06] | -0.06 [-0.28, 0.15] | 5.48 | .001** | .030 [.008, .053] |
| * *p* < .05, ** *p* < .01, ** *p* < .001  *Note.* Means are estimated marginal means of the difference scores in the model in RQ2. Difference scores are the differences of z-transformed LIWC scores “translator minus speaker”, which can be seen as effect sizes corresponding to Cohen’s *d*.  Difference scores < 0 mean that the according category was used less often by the translator than by the original speaker.  The LIWC variables investigated here were determined based on the gender differences in function word categories that were empirically found in RQ 1. | | | | | | | | |

# Supplemental Material H

## Intercorrelations: Tables with bivariate Pearson correlations of the dependent variables of the MANOVAS conducted in Research Question 1 and 2.

## Research Question 1.

| Table S11. Inter-correlations between the dependent variables of the model reported in RQ1, TED speaker’s language use in “Full Sample” (*N* = 1,647). | | | | | | | | | | | | | | | | | | | | | | | | | | | | | | | | | | |
| --- | --- | --- | --- | --- | --- | --- | --- | --- | --- | --- | --- | --- | --- | --- | --- | --- | --- | --- | --- | --- | --- | --- | --- | --- | --- | --- | --- | --- | --- | --- | --- | --- | --- | --- |
| Variables | 1 | 2 | 3 | 4 | 5 | 6 | 7 | 8 | 9 | 10 | 11 | 12 | 13 | 14 | 15 | 16 | 17 | 18 | 19 | 20 | 21 | 22 | 23 | 24 | 25 | 26 | 27 | 28 | 29 | 30 | 31 | 32 | 33 | 34 |
| *M* | 2.92 | 1.05 | 4.04 | 2.82 | 2.24 | 1.19 | 0.45 | 0.73 | 2.12 | 2.67 | 1.91 | 2.11 | 1.19 | 1.29 | 0.25 | 0.19 | 0.03 | 1.25 | 2.52 | 1.23 | 1.08 | 0.88 | 1.23 | 0.85 | 1.39 | 2.39 | 1.36 | 0.88 | 1.17 | 2.47 | 0.23 | 0.33 | 0.16 | 0.01 |
| *SD* | 0.17 | 0.29 | 0.06 | 0.18 | 0.26 | 0.52 | 0.42 | 0.31 | 0.16 | 0.10 | 0.19 | 0.15 | 0.20 | 0.27 | 0.24 | 0.19 | 0.06 | 0.30 | 0.18 | 0.24 | 0.22 | 0.22 | 0.24 | 0.20 | 0.21 | 0.26 | 0.34 | 0.25 | 0.27 | 0.22 | 0.20 | 0.22 | 0.13 | 0.04 |
| 1. Sixltr | - |  |  |  |  |  |  |  |  |  |  |  |  |  |  |  |  |  |  |  |  |  |  |  |  |  |  |  |  |  |  |  |  |  |
| 2. number | -.01 | - |  |  |  |  |  |  |  |  |  |  |  |  |  |  |  |  |  |  |  |  |  |  |  |  |  |  |  |  |  |  |  |  |
| 3. function | -.60** | -.33** | - |  |  |  |  |  |  |  |  |  |  |  |  |  |  |  |  |  |  |  |  |  |  |  |  |  |  |  |  |  |  |  |
| 4. pronoun | -.65** | -.25** | .77** | - |  |  |  |  |  |  |  |  |  |  |  |  |  |  |  |  |  |  |  |  |  |  |  |  |  |  |  |  |  |  |
| 5. ppron | -.57** | -.20** | .50** | .83** | - |  |  |  |  |  |  |  |  |  |  |  |  |  |  |  |  |  |  |  |  |  |  |  |  |  |  |  |  |  |
| 6. I | -.40** | -.16** | .32** | .56** | .74** | - |  |  |  |  |  |  |  |  |  |  |  |  |  |  |  |  |  |  |  |  |  |  |  |  |  |  |  |  |
| 7. shehe | -.22** | -.09** | .17** | .32** | .47** | .29** | - |  |  |  |  |  |  |  |  |  |  |  |  |  |  |  |  |  |  |  |  |  |  |  |  |  |  |  |
| 8. they | .04 | -.03 | .00 | .03 | .11** | -.13** | .12** | - |  |  |  |  |  |  |  |  |  |  |  |  |  |  |  |  |  |  |  |  |  |  |  |  |  |  |
| 9. article | .23** | .10** | -.18** | -.54** | -.57** | -.40** | -.19** | -.08** | - |  |  |  |  |  |  |  |  |  |  |  |  |  |  |  |  |  |  |  |  |  |  |  |  |  |
| 10. prep | .32** | -.03 | -.17** | -.44** | -.39** | -.24** | -.14** | .00 | .29** | - |  |  |  |  |  |  |  |  |  |  |  |  |  |  |  |  |  |  |  |  |  |  |  |  |
| 11. adverb | -.31** | -.14** | .53** | .32** | .06* | -.04 | -.15** | -.11** | -.18** | -.25** | - |  |  |  |  |  |  |  |  |  |  |  |  |  |  |  |  |  |  |  |  |  |  |  |
| 12. conj | -.22** | -.23** | .45** | .27** | .19** | .13** | .04 | .07** | -.20** | -.24** | .40** | - |  |  |  |  |  |  |  |  |  |  |  |  |  |  |  |  |  |  |  |  |  |  |
| 13. quant | .08** | .16** | -.11** | -.13** | -.23** | -.21** | -.29** | .00 | -.07** | .05* | .20** | -.02 | - |  |  |  |  |  |  |  |  |  |  |  |  |  |  |  |  |  |  |  |  |  |
| 14. posemo | -.03 | -.14** | -.04 | .17** | .26** | .23** | .12** | .03 | -.31** | -.28** | .00 | .03 | .07** | - |  |  |  |  |  |  |  |  |  |  |  |  |  |  |  |  |  |  |  |  |
| 15. anger | .07** | -.07** | -.09** | -.03 | .09** | .12** | .17** | .16** | -.05* | -.02 | -.18** | -.09** | -.09** | .08** | - |  |  |  |  |  |  |  |  |  |  |  |  |  |  |  |  |  |  |  |
| 16. anx | .09** | -.09** | -.07** | .03 | .15** | .17** | .12** | .05* | -.22** | -.02 | -.11** | -.03 | -.03 | .12** | .31** | - |  |  |  |  |  |  |  |  |  |  |  |  |  |  |  |  |  |  |
| 17. swear | -.17** | -.05* | .05* | .17** | .17** | .15** | .08** | .01 | -.13** | -.16** | .03 | -.05* | -.02 | .12** | .22** | .06* | - |  |  |  |  |  |  |  |  |  |  |  |  |  |  |  |  |  |
| 18. percept | -.37** | -.16** | .20** | .32** | .31** | .30** | .14** | -.14** | -.06* | -.21** | .09** | .10** | -.18** | .09** | -.08** | -.04 | .10** | - |  |  |  |  |  |  |  |  |  |  |  |  |  |  |  |  |
| 19. cogproc | -.01 | -.27** | .32** | .30** | .12** | .03 | -.08** | -.01 | -.32** | -.23** | .39** | .20** | .30** | .26** | -.01 | .13** | .04 | -.07** | - |  |  |  |  |  |  |  |  |  |  |  |  |  |  |  |
| 20. insight | .03 | -.28** | .21** | .26** | .20** | .17** | .05 | .01 | -.24** | -.11** | .13** | .09** | .02 | .19** | .05 | .16** | .03 | .03 | .67** | - |  |  |  |  |  |  |  |  |  |  |  |  |  |  |
| 21. cause | .23** | -.13** | -.04 | -.06* | -.17** | -.20** | -.23** | .00 | -.02 | -.09** | .13** | .11** | .12** | .07** | -.08** | -.03 | -.07** | -.16** | .45** | .14** | - |  |  |  |  |  |  |  |  |  |  |  |  |  |
| 22. discrep | -.17** | -.05* | .24** | .25** | .21** | .08** | .04 | -.02 | -.24** | -.19** | .15** | .08** | .07** | .17** | -.04 | .08** | .03 | -.08** | .51** | .18** | .16** | - |  |  |  |  |  |  |  |  |  |  |  |  |
| 23. tentat | -.07** | -.14** | .26** | .18** | -.02 | -.08** | -.14** | -.03 | -.15** | -.12** | .39** | .15** | .35** | .12** | -.04 | .02 | .03 | -.01 | .69** | .35** | .11** | .33** | - |  |  |  |  |  |  |  |  |  |  |  |
| 24. certain | -.08** | -.03 | .12** | .17** | .14** | .12** | .08** | -.02 | -.17** | -.14** | .07** | -.02 | .27** | .19** | .08** | .09** | .08** | .02 | .37** | .19** | -.09** | .14** | .12** | - |  |  |  |  |  |  |  |  |  |  |
| 25. differ | -.03 | -.13** | .28** | .19** | .03 | -.06* | -.08** | .03 | -.24** | -.22** | .38** | .24** | .26** | .15** | .04 | .11** | .03 | -.08** | .72** | .29** | .19** | .34** | .56** | .16** | - |  |  |  |  |  |  |  |  |  |
| 26. social | -.25** | -.15** | .24** | .49** | .61** | .14** | .50** | .41** | -.43** | -.27** | -.05 | .07** | -.10** | .27** | .20** | .14** | .13** | .03 | .14** | .19** | -.09** | .16** | .02 | .14** | .12** | - |  |  |  |  |  |  |  |  |
| 27. affiliation | .08** | -.08** | .00 | .07** | .11** | -.24** | -.08** | .03 | -.15** | .02 | -.03 | .01 | .09** | .08** | .00 | -.01 | -.02 | -.15** | .06* | .05 | .10** | .09** | -.05* | -.01 | .05* | .44** | - |  |  |  |  |  |  |  |
| 28. achieve | .26** | .04 | -.20** | -.16** | -.07** | -.08** | -.05* | .05 | -.05 | .07** | -.14** | -.08** | .04 | .27** | -.02 | .03 | -.07** | -.28** | .10** | .06* | .26** | .07** | -.04 | -.04 | .02 | .00 | .11** | - |  |  |  |  |  |  |
| 29. power | .22** | .10** | -.25** | -.25** | -.09** | -.07** | .09** | .24** | .03 | .12** | -.26** | -.17** | -.04 | .08** | .34** | .20** | .00 | -.30** | -.11** | -.08** | -.01 | .02 | -.19** | .02 | -.05 | .15** | .05 | .29** | - |  |  |  |  |  |
| 30 focuspresent | -.35** | -.12** | .42** | .43** | .16** | -.11** | -.16** | -.03 | -.26** | -.35** | .46** | .11** | .16** | .14** | -.15** | -.12** | .09** | .07** | .37** | .16** | .21** | .25** | .37** | .06* | .33** | .23** | .14** | -.05* | -.16** | - |  |  |  |  |
| 31. home | -.07** | .03 | -.07** | .02 | .18** | .19** | .22** | .12** | -.08** | .03 | -.18** | .02 | -.08** | -.02 | .04 | .05* | .02 | -.05 | -.22** | -.17** | -.18** | -.05 | -.17** | -.02 | -.17** | .18** | .05* | -.02 | .06* | -.22** | - |  |  |  |
| 32. informal | -.30** | -.01 | .17** | .26** | .20** | .15** | .02 | -.07** | -.21** | -.34** | .28** | .04 | .06* | .31** | .02 | -.04 | .38** | .16** | .16** | .08** | -.03 | .09** | .17** | .12** | .12** | .12** | -.09** | -.11** | -.09** | .28** | -.06** | - |  |  |
| 33. nonflu | -.20** | -.03 | .17** | .16** | .08** | .01 | .00 | -.04 | -.11** | -.22** | .31** | .08** | .07** | .24** | -.06* | -.04 | .11** | .06* | .17** | .09** | .00 | .09** | .16** | .11** | .14** | .07** | -.06* | -.06* | -.07** | .24** | -.08** | .69** | - |  |
| 34. filler | -.17** | -.05* | .11** | .15** | .12** | .13** | .08** | -.04 | -.09** | -.15** | .08** | .04 | .01 | .07** | .00 | .00 | .10** | .12** | .04 | .00 | -.05* | .04 | .06* | .06** | .03 | .04 | -.09** | -.10** | -.11** | .09** | .03 | .30** | .14** | - |
| *Note. M* = Mean, *SD* = Standard deviation. LIWC variables were log-transformed ln(x+1). *M* = Mean, *SD* = Standard deviation. * *p* < .05, ** *p* < .01, ** *p* < .001 | | | | | | | | | | | | | | | | | | | | | | | | | | | | | | | | | | |

| *Table S12.* Inter-correlations between the dependent variables of the model reported in Table S6, TED *speaker*’s language use in “Translated Subsample” (*N* = 544). | | | | | | | | | | | | | | | | | | | | | | | | | | | | | | | | | | | |
| --- | --- | --- | --- | --- | --- | --- | --- | --- | --- | --- | --- | --- | --- | --- | --- | --- | --- | --- | --- | --- | --- | --- | --- | --- | --- | --- | --- | --- | --- | --- | --- | --- | --- | --- | --- |
| Variables | 1 | 2 | 3 | 4 | 5 | 6 | 7 | 8 | 9 | 10 | 11 | 12 | 13 | 14 | 15 | 16 | 17 | 18 | 19 | 20 | 21 | 22 | 23 | 24 | 25 | 26 | 27 | 28 | 29 | 30 | 31 | 32 | 33 | 34 | |
| *M* | 2.93 | 1.06 | 4.04 | 2.81 | 2.22 | 1.16 | 0.45 | 0.74 | 2.13 | 2.68 | 1.91 | 2.10 | 1.20 | 1.27 | 0.25 | 0.20 | 0.03 | 1.21 | 2.53 | 1.23 | 1.09 | 0.90 | 1.24 | 0.85 | 1.40 | 2.38 | 1.36 | 0.90 | 1.19 | 2.47 | 0.23 | 0.34 | 0.17 | 0.01 | |
| *SD* | 0.16 | 0.28 | 0.06 | 0.17 | 0.26 | 0.52 | 0.40 | 0.29 | 0.15 | 0.10 | 0.19 | 0.16 | 0.19 | 0.26 | 0.24 | 0.20 | 0.06 | 0.29 | 0.17 | 0.23 | 0.21 | 0.20 | 0.22 | 0.18 | 0.19 | 0.26 | 0.32 | 0.24 | 0.27 | 0.21 | 0.18 | 0.20 | 0.13 | 0.03 | |
| 1. Sixltr | - |  |  |  |  |  |  |  |  |  |  |  |  |  |  |  |  |  |  |  |  |  |  |  |  |  |  |  |  |  |  |  |  |  | |
| 2. number | .02 | - |  |  |  |  |  |  |  |  |  |  |  |  |  |  |  |  |  |  |  |  |  |  |  |  |  |  |  |  |  |  |  |  | |
| 3. function | -.63** | -.36** | - |  |  |  |  |  |  |  |  |  |  |  |  |  |  |  |  |  |  |  |  |  |  |  |  |  |  |  |  |  |  |  | |
| 4. pronoun | -.67** | -.27** | .75** | - |  |  |  |  |  |  |  |  |  |  |  |  |  |  |  |  |  |  |  |  |  |  |  |  |  |  |  |  |  |  | |
| 5. ppron | -.58** | -.18** | .49** | .84** | - |  |  |  |  |  |  |  |  |  |  |  |  |  |  |  |  |  |  |  |  |  |  |  |  |  |  |  |  |  | |
| 6. i | -.40** | -.18** | .34** | .60** | .75** | - |  |  |  |  |  |  |  |  |  |  |  |  |  |  |  |  |  |  |  |  |  |  |  |  |  |  |  |  | |
| 7. shehe | -.26** | -.08 | .20** | .36** | .50** | .35** | - |  |  |  |  |  |  |  |  |  |  |  |  |  |  |  |  |  |  |  |  |  |  |  |  |  |  |  | |
| 8. they | .04 | -.01 | -.07 | .04 | .12** | -.13** | .08 | - |  |  |  |  |  |  |  |  |  |  |  |  |  |  |  |  |  |  |  |  |  |  |  |  |  |  | |
| 9. article | .22** | .10* | -.15** | -.54** | -.60** | -.43** | -.24** | -.12** | - |  |  |  |  |  |  |  |  |  |  |  |  |  |  |  |  |  |  |  |  |  |  |  |  |  | |
| 10. prep | .33** | -.01 | -.16** | -.42** | -.39** | -.27** | -.13** | -.01 | .24** | - |  |  |  |  |  |  |  |  |  |  |  |  |  |  |  |  |  |  |  |  |  |  |  |  | |
| 11. adverb | -.32** | -.15** | .52** | .24** | -.01 | -.08 | -.17** | -.15** | -.08 | -.23** | - |  |  |  |  |  |  |  |  |  |  |  |  |  |  |  |  |  |  |  |  |  |  |  | |
| 12. conj | -.26** | -.23** | .45** | .28** | .21** | .20** | .06 | -.02 | -.21** | -.27** | .37** | - |  |  |  |  |  |  |  |  |  |  |  |  |  |  |  |  |  |  |  |  |  |  | |
| 13. quant | .03 | .16** | -.13** | -.15** | -.24** | -.25** | -.32** | .01 | -.04 | .02 | .21** | -.04 | - |  |  |  |  |  |  |  |  |  |  |  |  |  |  |  |  |  |  |  |  |  | |
| 14. posemo | -.05 | -.14** | -.01 | .20** | .26** | .24** | .13** | .07 | -.31** | -.29** | .01 | .08* | .08 | - |  |  |  |  |  |  |  |  |  |  |  |  |  |  |  |  |  |  |  |  | |
| 15. anger | .11** | -.07 | -.13** | -.08 | .04 | .11** | .16** | .15** | -.04 | .01 | -.19** | -.13** | -.06 | .09* | - |  |  |  |  |  |  |  |  |  |  |  |  |  |  |  |  |  |  |  | |
| 16. anx | .13** | -.12** | -.08 | .02 | .13** | .18** | .08 | .02 | -.25** | -.04 | -.08 | .02 | -.04 | .14** | .35** | - |  |  |  |  |  |  |  |  |  |  |  |  |  |  |  |  |  |  | |
| 17. swear | -.22** | -.04 | .04 | .22** | .25** | .25** | .12** | -.03 | -.15** | -.23** | -.02 | -.09* | -.10* | .19** | .24** | .14** | - |  |  |  |  |  |  |  |  |  |  |  |  |  |  |  |  |  | |
| 18. percept | -.40** | -.16** | .22** | .37** | .37** | .37** | .18** | -.17** | -.07 | -.21** | .07 | .14** | -.11** | .09* | -.10* | -.07 | .15** | - |  |  |  |  |  |  |  |  |  |  |  |  |  |  |  |  | |
| 19. cogproc | -.03 | -.32** | .31** | .26** | .10* | .03 | -.09* | -.01 | -.27** | -.23** | .38** | .18** | .28** | .25** | .03 | .16** | .09* | -.06 | - |  |  |  |  |  |  |  |  |  |  |  |  |  |  |  | |
| 20. insight | -.02 | -.35** | .24** | .30** | .23** | .18** | .06 | .03 | -.26** | -.14** | .12** | .12** | .02 | .21** | .02 | .15** | .10* | .09* | .68** | - |  |  |  |  |  |  |  |  |  |  |  |  |  |  | |
| 21. cause | .20** | -.12** | -.04 | -.03 | -.12** | -.14** | -.21** | .06 | -.04 | -.12** | .12** | .07 | .10* | .10* | .00 | .03 | -.01 | -.14** | .47** | .17** | - |  |  |  |  |  |  |  |  |  |  |  |  |  | |
| 22. discrep | -.14** | -.02 | .21** | .23** | .19** | .07 | .01 | -.02 | -.22** | -.20** | .15** | .07 | .04 | .14** | -.02 | .08 | .09* | -.09* | .50** | .17** | .14** | - |  |  |  |  |  |  |  |  |  |  |  |  | |
| 23. tentat | -.07 | -.19** | .23** | .09* | -.10* | -.14** | -.19** | -.06 | -.07 | -.10* | .42** | .13** | .39** | .09* | -.06 | -.03 | .01 | -.04 | .69** | .35** | .13** | .32** | - |  |  |  |  |  |  |  |  |  |  |  | |
| 24. certain | -.10* | -.03 | .16** | .18** | .15** | .12** | .10* | -.04 | -.13** | -.12** | .07 | .01 | .26** | .20** | .11** | .12** | .13** | -.03 | .39** | .19** | -.05 | .20** | .15** | - |  |  |  |  |  |  |  |  |  |  | |
| 25. differ | .00 | -.18** | .25** | .11* | -.02 | -.09* | -.13** | -.03 | -.19** | -.17** | .38** | .21** | .25** | .12** | .04 | .14** | .02 | -.13** | .72** | .29** | .21** | .38** | .58** | .17** | - |  |  |  |  |  |  |  |  |  | |
| 26. social | -.30** | -.09* | .23** | .52** | .64** | .18** | .51** | .42** | -.47** | -.27** | -.08 | .07 | -.10* | .27** | .17** | .09* | .14** | .06 | .11** | .20** | -.10* | .14** | -.03 | .14** | .08 | - |  |  |  |  |  |  |  |  | |
| 27. affiliation | .09* | -.03 | -.04 | .05 | .11* | -.28** | -.14** | .13** | -.16** | .03 | -.05 | -.01 | .09* | .05 | -.03 | -.02 | -.09* | -.15** | .04 | .03 | .03 | .06 | -.03 | .04 | .06 | .45** | - |  |  |  |  |  |  |  | |
| 28. achieve | .26** | .04 | -.22** | -.14** | -.06 | -.08 | -.11** | .11* | -.10* | .06 | -.14** | -.13** | .02 | .26** | -.04 | .03 | -.05 | -.28** | .06 | .03 | .25** | .06 | -.05 | -.07 | .01 | .01 | .16** | - |  |  |  |  |  |  | |
| 29. power | .22** | .07 | -.28** | -.23** | -.06 | -.02 | .12** | .27** | -.01 | .10* | -.30** | -.20** | -.08 | .15** | .43** | .18** | .02 | -.30** | -.13** | -.15** | .02 | .02 | -.19** | .03 | -.07 | .17** | .06 | .27** | - |  |  |  |  |  | |
| 30. focuspresent | -.36** | -.14** | .40** | .40** | .14** | -.11* | -.16** | .02 | -.23** | -.34** | .42** | .06 | .15** | .16** | -.16** | -.15** | .09* | .02 | .35** | .17** | .21** | .25** | .34** | .07 | .31** | .25** | .17** | -.02 | -.14** | - |  |  |  |  | |
| 31. home | -.10* | .01 | -.03 | .14** | .29** | .27** | .24** | .09* | -.20** | -.05 | -.18** | .06 | -.10* | -.02 | .01 | .03 | .04 | .05 | -.22** | -.14** | -.20** | -.01 | -.17** | -.05 | -.18** | .22** | .05 | .00 | .06 | -.17** | - |  |  |  | |
| 32. informal | -.33** | .00 | .17** | .24** | .19** | .15** | .02 | -.14** | -.15** | -.40** | .31** | .04 | .08 | .33** | -.05 | -.04 | .34** | .18** | .15** | .08 | -.04 | .10* | .18** | .15** | .09* | .10* | -.09* | -.15** | -.08 | .26** | -.02 | - |  |  | |
| 33. nonflu | -.22** | -.06 | .18** | .15** | .09* | .01 | -.03 | -.14** | -.09* | -.24** | .34** | .10* | .13** | .26** | -.09* | -.06 | .10* | .08 | .17** | .06 | .04 | .09* | .19** | .11* | .12** | .05 | -.01 | -.10* | -.09* | .21** | -.10* | .71** | - |  | |
| 34. filler | -.17** | -.05 | .13** | .14** | .11** | .15** | .07 | -.04 | -.05 | -.16** | .09* | .07 | .07 | .08 | -.03 | -.03 | .09* | .12** | .02 | -.06 | -.06 | .04 | .08 | .03 | -.01 | -.02 | -.13** | -.17** | -.11** | .07 | .14** | .28** | .09* | - | |
| *Note. M* = Mean, *SD* = Standard deviation. LIWC variables were log-transformed ln(x+1). *M* = Mean, *SD* = Standard deviation. * *p* < .05, ** *p* < .01, ** *p* < .001 | | | | | | | | | | | | | | | | | | | | | | | | | | | | | | | | | | |

| *Table S13.* Inter-correlations between the dependent variables of the model reported in RQ1, TED translator’s language use (“Translated Subsample, *N* = 544). | | | | | | | | | | | | | | | | | | | | | | | | | | | | | | | | | | |
| --- | --- | --- | --- | --- | --- | --- | --- | --- | --- | --- | --- | --- | --- | --- | --- | --- | --- | --- | --- | --- | --- | --- | --- | --- | --- | --- | --- | --- | --- | --- | --- | --- | --- | --- |
| Variables | 1 | 2 | 3 | 4 | 5 | 6 | 7 | 8 | 9 | 10 | 11 | 12 | 13 | 14 | 15 | 16 | 17 | 18 | 19 | 20 | 21 | 22 | 23 | 24 | 25 | 26 | 27 | 28 | 29 | 30 | 31 | 32 | 33 | 34 | |
| *M* | 3.29 | 0.97 | 4.00 | 2.90 | 2.35 | 1.19 | 1.33 | 0.99 | 2.47 | 2.39 | 1.59 | 2.58 | 1.36 | 1.34 | 0.20 | 0.16 | 0.02 | 1.09 | 2.80 | 1.24 | 1.25 | 1.11 | 1.38 | 1.35 | 1.64 | 2.63 | 1.39 | 1.49 | 0.91 | 1.79 | 0.19 | 0.86 | 0.03 | 0.03 | |
| SD | 0.14 | 0.29 | 0.05 | 0.16 | 0.24 | 0.54 | 0.28 | 0.30 | 0.14 | 0.12 | 0.17 | 0.10 | 0.18 | 0.23 | 0.20 | 0.17 | 0.05 | 0.25 | 0.14 | 0.22 | 0.18 | 0.18 | 0.20 | 0.21 | 0.16 | 0.19 | 0.32 | 0.16 | 0.25 | 0.24 | 0.16 | 0.26 | 0.06 | 0.05 | |
| 1. Sixltr | - |  |  |  |  |  |  |  |  |  |  |  |  |  |  |  |  |  |  |  |  |  |  |  |  |  |  |  |  |  |  |  |  |  | |
| 2. number | .06 | - |  |  |  |  |  |  |  |  |  |  |  |  |  |  |  |  |  |  |  |  |  |  |  |  |  |  |  |  |  |  |  |  | |
| 3. function | -.67  ** | -.39  ** | - |  |  |  |  |  |  |  |  |  |  |  |  |  |  |  |  |  |  |  |  |  |  |  |  |  |  |  |  |  |  |  | |
| 4. pronoun | -.70  ** | -.30  ** | .78** | - |  |  |  |  |  |  |  |  |  |  |  |  |  |  |  |  |  |  |  |  |  |  |  |  |  |  |  |  |  |  | |
| 5. ppron | -.60  ** | -.30*  * | .60** | .85** | - |  |  |  |  |  |  |  |  |  |  |  |  |  |  |  |  |  |  |  |  |  |  |  |  |  |  |  |  |  | |
| 6. i | -.56  ** | -.21  ** | .45** | .63** | .74** | - |  |  |  |  |  |  |  |  |  |  |  |  |  |  |  |  |  |  |  |  |  |  |  |  |  |  |  |  | |
| 7. shehe | -.28  ** | -.21  ** | .27** | .37** | .48** | .13** | - |  |  |  |  |  |  |  |  |  |  |  |  |  |  |  |  |  |  |  |  |  |  |  |  |  |  |  | |
| 8. they | -.16  ** | -.09* | .17** | .26** | .34** | .01 | .78** | - |  |  |  |  |  |  |  |  |  |  |  |  |  |  |  |  |  |  |  |  |  |  |  |  |  |  | |
| 9. article | .31** | .08 | -.20  ** | -.50  ** | -.62*  * | -.54  ** | -.20  ** | -.17  ** | - |  |  |  |  |  |  |  |  |  |  |  |  |  |  |  |  |  |  |  |  |  |  |  |  |  | |
| 10. prep | .38** | .12** | -.32  ** | -.45  ** | -.23  ** | -.13  ** | -.13  ** | -.15  ** | .09* | - |  |  |  |  |  |  |  |  |  |  |  |  |  |  |  |  |  |  |  |  |  |  |  |  | |
| 11. adverb | -.14  ** | -.04 | .29** | .13** | .04 | .10* | -.10* | -.09* | -.17  ** | -.13  ** | - |  |  |  |  |  |  |  |  |  |  |  |  |  |  |  |  |  |  |  |  |  |  |  | |
| 12. conj | -.33  ** | -.24  ** | .52  ** | .30  ** | .12  ** | .14  ** | -.07 | -.08 | -.14  ** | -.28  ** | .30  ** | - |  |  |  |  |  |  |  |  |  |  |  |  |  |  |  |  |  |  |  |  |  |  | |
| 13. quant | -.03 | .14** | .11* | .03 | -.19  ** | -.11  ** | -.26  ** | -.11* | -.02 | -.20  ** | .40** | .19** | - |  |  |  |  |  |  |  |  |  |  |  |  |  |  |  |  |  |  |  |  |  | |
| 14. posemo | -.18  ** | -.14  ** | .08 | .24** | .24** | .18** | .14** | .15** | -.28  ** | -.29  ** | .10* | .09* | .05 | - |  |  |  |  |  |  |  |  |  |  |  |  |  |  |  |  |  |  |  |  | |
| 15. anger | .08 | -.08* | -.04 | -.05 | .06 | .07 | .18** | .17** | -.05 | .05 | .01 | -.08 | -.10* | -.03 | - |  |  |  |  |  |  |  |  |  |  |  |  |  |  |  |  |  |  |  | |
| 16. anx | .03 | -.11* | .03 | .09* | .17** | .19** | .06 | .05 | -.22  ** | .03 | .03 | .00 | -.02 | .06 | .41** | - |  |  |  |  |  |  |  |  |  |  |  |  |  |  |  |  |  |  | |
| 17. swear | -.10* | -.08 | .08 | .13** | .12** | .11** | .06 | .04 | -.03 | -.18  ** | .02 | -.02 | .04 | .03 | .28** | .16** | - |  |  |  |  |  |  |  |  |  |  |  |  |  |  |  |  |  | |
| 18. percept | -.37  ** | -.18  ** | .19** | .33** | .30** | .26** | .15** | .00 | -.08 | -.16  ** | -.01 | .05 | -.15  ** | .13** | -.11* | -.09* | .02 | - |  |  |  |  |  |  |  |  |  |  |  |  |  |  |  |  | |
| 19. cogproc | -.08 | -.25  ** | .35** | .28** | .09* | .06 | -.09* | -.02 | -.24  ** | -.34  ** | .47** | .37** | .41** | .26** | -.03 | .12** | .05 | -.01 | - |  |  |  |  |  |  |  |  |  |  |  |  |  |  |  | |
| 20. insight | -.14  ** | -.37  ** | .32** | .38** | .33** | .27** | .10* | .07 | -.28  ** | -.25  ** | .17** | .21** | .01 | .23** | -.07 | .15** | .10* | .15** | .62** | - |  |  |  |  |  |  |  |  |  |  |  |  |  |  | |
| 21. cause | -.13  ** | -.17  ** | .28** | .20** | -.02 | -.06 | -.08 | .01 | .00 | -.35  ** | .30** | .38** | .24** | .14** | -.12  ** | -.08 | .08 | .07 | .56** | .22** | - |  |  |  |  |  |  |  |  |  |  |  |  |  | |
| 22. discrep | -.20  ** | -.12  ** | .33** | .30** | .18** | .11** | .06 | .07 | -.22  ** | -.35  ** | .19** | .28** | .17** | .18** | .06 | .14** | .10* | -.09* | .56** | .23** | .26** | - |  |  |  |  |  |  |  |  |  |  |  |  | |
| 23. tentat | -.07 | -.08 | .23** | .16** | .02 | -.04 | -.07 | .02 | -.18  ** | -.25  ** | .46** | .29** | .45** | .17** | -.05 | .08 | .02 | -.06 | .70** | .29** | .33** | .46  ** | - |  |  |  |  |  |  |  |  |  |  |  | |
| 24. certain | -.21  ** | -.06 | .32** | .32** | .22** | .14** | .08 | .09* | -.27  ** | -.32  ** | .21** | .15** | .30** | .18** | .13** | .19** | .07 | -.10* | .60** | .36** | .11** | .43  ** | .33** | - |  |  |  |  |  |  |  |  |  |  | |
| 25. differ | -.02 | -.19  ** | .26** | .17** | .08 | .04 | -.04 | .00 | -.22  ** | -.20  ** | .38** | .32** | .24** | .11** | .13** | .19** | .02 | -.07 | .69** | .30** | .19** | .53  ** | .59** | .48** | - |  |  |  |  |  |  |  |  |  | |
| 26. social | -.28  ** | -.18  ** | .35** | .49** | .52** | .10* | .53** | .52** | -.39  ** | -.28  ** | -.01 | .06 | -.08 | .24** | .18** | .09* | .05 | .05 | .22** | .27** | .04 | .26  ** | .16** | .38** | .18** | - |  |  |  |  |  |  |  |  | |
| 27.affiliation | .19** | -.01 | -.04 | -.01 | .06 | -.33  ** | -.09* | .02 | -.05 | .04 | -.04 | .00 | .01 | .00 | .00 | -.02 | -.06 | -.12  ** | .05 | .05 | .03 | .06 | .03 | .12** | .04 | .48** | - |  |  |  |  |  |  |  | |
| 28. achiev | .05 | .00 | -.01 | .03 | -.01 | -.03 | -.04 | .04 | -.08 | -.03 | .04 | .03 | .13  ** | .36  ** | -.04 | -.01 | .02 | -.03 | .26  ** | .15  ** | .34  ** | .13** | .09* | .09* | .00 | .06 | .13** | - |  |  |  |  |  |  | |
| 29. power | .17** | .03 | -.14  ** | -.19  ** | -.09* | -.05 | .14** | .19** | .03 | .07 | -.14  ** | -.17  ** | -.11* | .10* | .39** | .18** | .03 | -.29  ** | -.02 | -.03 | -.10* | .04 | -.08 | .15** | .01 | .23** | .08 | .13** | - |  |  |  |  |  | |
| 30. focus-present | -.32  ** | -.09* | .35** | .29** | .00 | .00 | -.08 | .02 | .03 | -.52  ** | .14** | .22** | .27** | .19** | -.14  ** | -.14  ** | .04 | .12** | .32** | .14** | .31** | .19  ** | .24** | .19** | .16** | .13** | -.07 | -.03 | -.06 | - |  |  |  |  | |
| 31. home | -.16  ** | -.07 | .08 | .14** | .22** | .21** | .10* | .06 | -.19  ** | .10* | -.10* | -.01 | -.13  ** | -.06 | .03 | .02 | .00 | .04 | -.08* | .03 | -.10* | -.02 | -.07 | -.02 | .00 | .16** | .07 | -.04 | .08 | -.12  ** | - |  |  |  | |
| 32. informal | -.45  ** | .01 | .30** | .38** | .18** | .10* | .06 | .06 | -.19  ** | -.54  ** | .16** | .22** | .16** | .27** | -.13  ** | -.08 | .13  ** | .18** | .29** | .25** | .32** | .22  ** | .24** | .22** | .09* | .20** | -.04 | .04 | -.15  ** | .41** | -.06 | - |  |  | |
| 33. nonflu | -.40  ** | -.07 | .18** | .27** | .21** | .26** | .08 | -.02 | -.17  ** | -.34  ** | .11** | .14** | -.01 | .13** | -.02 | -.06 | .09* | .20** | .07 | .08* | .12** | .05 | .05 | .07 | .01 | .07 | -.17  ** | -.05 | -.12  ** | .24** | .00 | .42** | - |  | |
| 34. filler | -.21  ** | -.01 | .15** | .12** | .07 | .13** | .00 | -.06 | -.05 | -.22  ** | .16** | .17** | .08 | .07 | -.05 | -.02 | .11  ** | .08 | .05 | .01 | .20** | .02 | .11* | .01 | -.03 | -.07 | -.16  ** | .04 | -.11  * | .13** | -.01 | .29** | .16** | - | |
| *Note. M* = Mean, *SD* = Standard deviation. LIWC variables were log-transformed ln(x+1). *M* = Mean, *SD* = Standard deviation. * *p* < .05, ** *p* < .01, ** *p* < .001 | | | | | | | | | | | | | | | | | | | | | | | | | | | | | | | | | | |

## Research Question 2.

| *Table S14.* Inter-correlations between the dependent variables (differences of z-transformed LIWC scores) in RQ2 (*N* = 544). | | | | | | | | | |
| --- | --- | --- | --- | --- | --- | --- | --- | --- | --- |
| LIWC variables (difference scores) | *M* | *SD* | 1 | 2 | 3 | 4 | 5 | 6 | 7 |
| 1. number_Diff | 0.00 | 0.41 | - |  |  |  |  |  |  |
| 2. ppron_Diff | 0.00 | 0.35 | -0.05 | - |  |  |  |  |  |
| 3. i_Diff | 0.00 | 0.11 | 0.07 | .29** | - |  |  |  |  |
| 4. shehe_Diff | 0.00 | 0.73 | 0.00 | .29** | -0.06 | - |  |  |  |
| 5. they_Diff | 0.00 | 0.79 | -.09* | .26** | -0.08 | -0.03 | - |  |  |
| 6. article_Diff | 0.00 | 0.61 | -0.01 | -.12** | -.10* | .09* | -0.03 | - |  |
| 7. conj_Diff | 0.00 | 0.84 | -0.03 | -0.03 | -0.02 | -0.03 | -0.02 | 0.03 | - |
| * *p* < .05, ** *p* < .01, ** *p* < .001  *Note. M* = Mean, *SD* = Standard deviation. LIWC variables r difference scores of z-transformed LIWC scores “translator minus speaker”. Difference scores < 0 mean that the according category was used less often by the translator than by the original speaker. | | | | | | | | | |
